# Supplementary material for: Mucins protect against Streptococcus pneumoniae virulence by suppressing pneumolysin expression
Source: PubMed Central journal article supplement (PMC11444151; doi:10.1172/jci182769), 2024-08-22

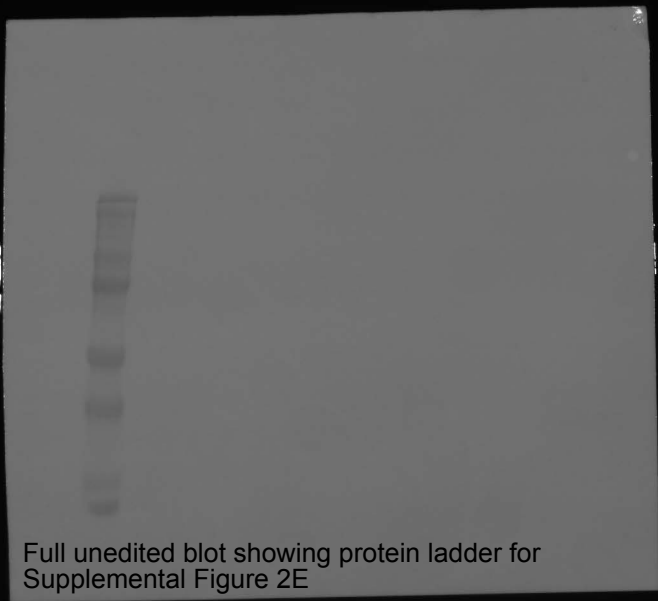

Full unedited blot showing protein ladder for  
Supplemental Figure 2E

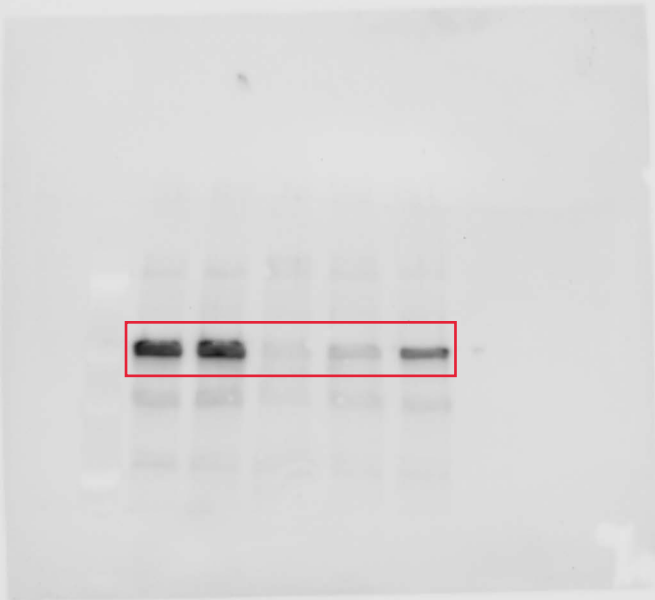

Full unedited blot for Supplemental Figure 2E

Full unedited total protein stain of blot for  
Supplemental Figure 2E

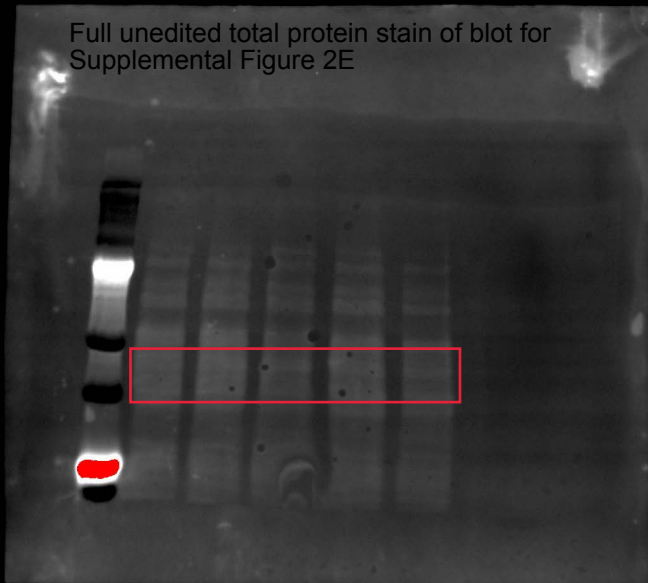

Supplement: jci-134-182769-s038.pdf [file jci-134-182769-s038.pdf]
